# Supplementary material
Source: publisher figshare collection journal article supplement (https://tandf.figshare.com/articles/dataset/_/12129807)
Supplement: Supplementary file 1 [file 1]

Archive with 4 entries (4 files):
- S figure1-Osmotic pressure.pdf
- S figure2-leaf area.pdf
- S figure3-K+ fluxes at various distances from the root tip.pdf
- Supplementary material.pdf
