# Supplementary material
Source: publisher figshare collection journal article supplement (https://tandf.figshare.com/articles/dataset/_/12129807)

---

## Supplemental Data

Supplementary Fig. 1. Osmotic pressure of polyethylene glycol (PEG) at different concentrations.

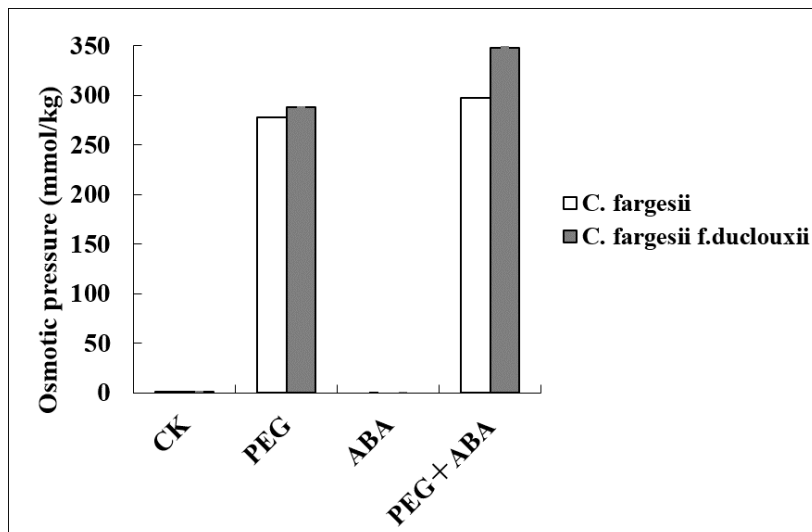

Supplementary Fig. 2. Changes in leaf size and shape with increasing PEG concentration in *Catalpa fargesii* and *C. fargesii* f. *duclouxii*. Scale bar = 5 cm.

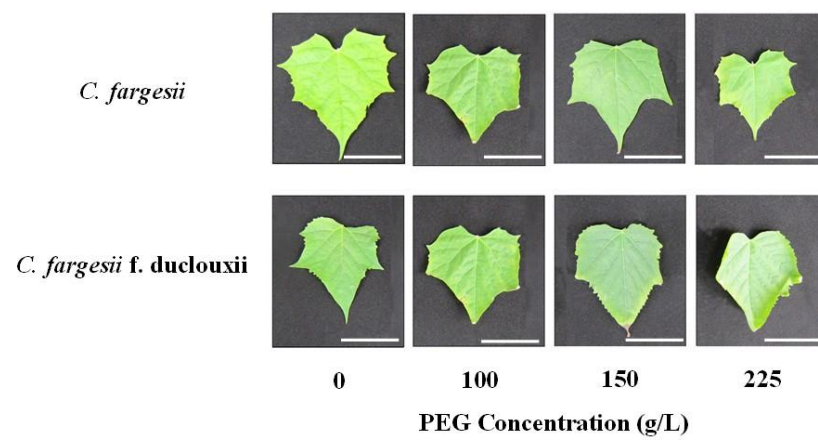

Supplementary Fig. 3.  $K^+$  fluxes at various distances from the root tip under control conditions in *Catalpa fargesii* and *C. fargesii* f. *duclouxii*.

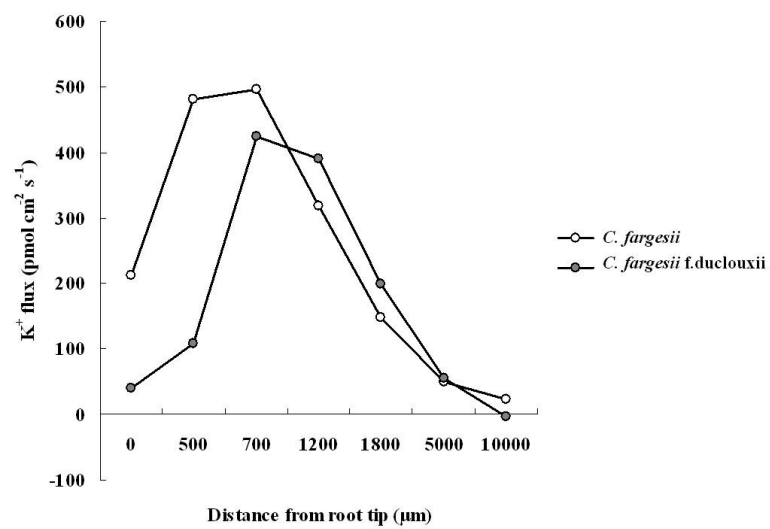

Supplement: Supplementary file 1 [file 1 › Supplementary material.pdf]
