# Supplementary material
Source: publisher figshare collection journal article supplement (https://tandf.figshare.com/articles/dataset/_/12129807)

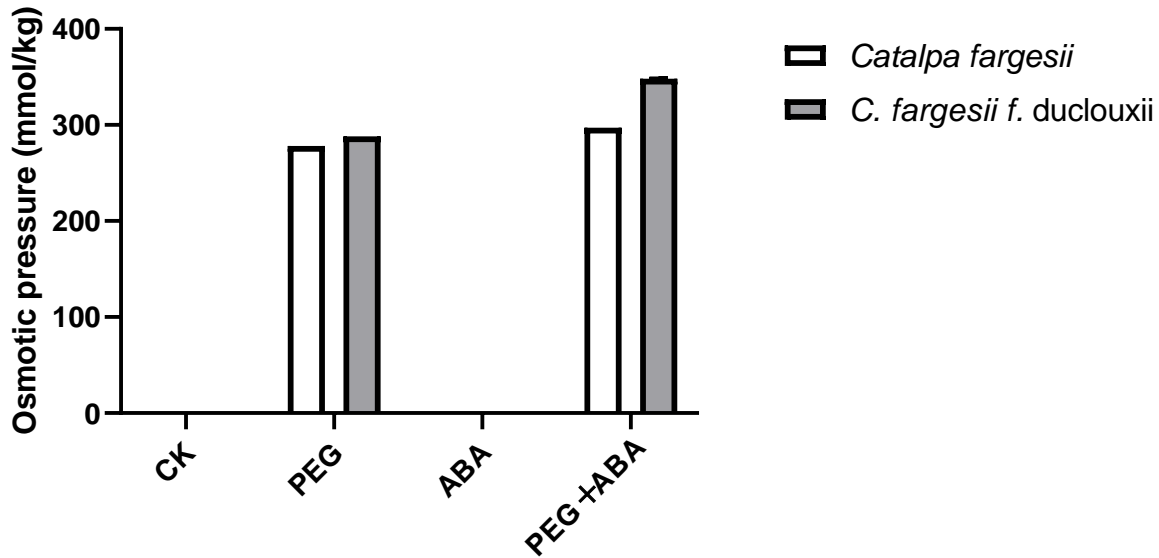

Supplement: Supplementary file 1 [file 1 › S figure1-Osmotic pressure.pdf]

***C.fargesii***

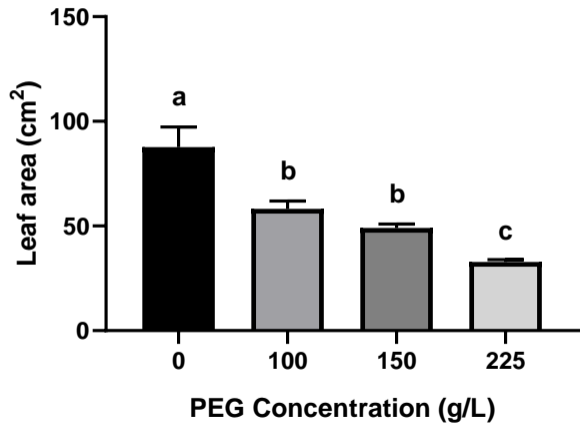

***C. fargesii f. duclouxii***

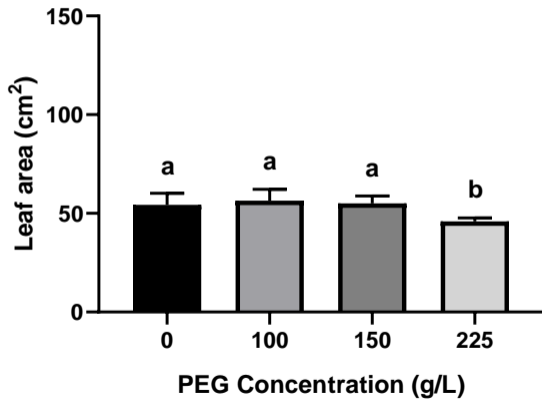

Supplement: Supplementary file 1 [file 1 › S figure2-leaf area.pdf]

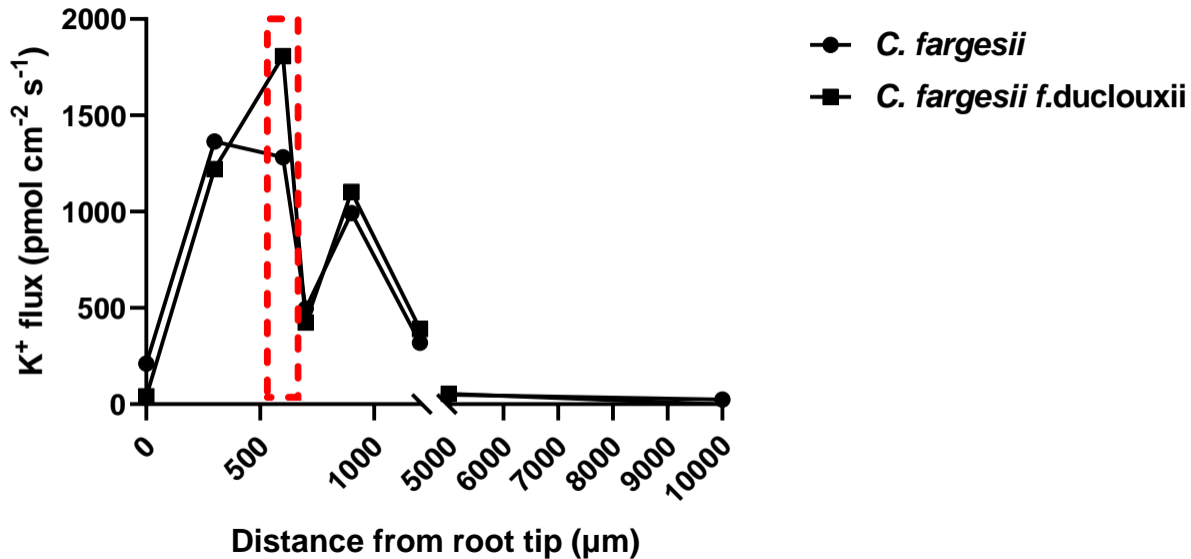

Supplement: Supplementary file 1 [file 1 › S figure3-K+ fluxes at various distances from the root tip.pdf]
